# Supplementary material for: A functional SNP associated with atopic dermatitis controls cell type-specific methylation of the VSTM1 gene locus
Source: PubMed Central journal article supplement (PMC5319034; doi:10.1186/s13073-017-0404-6), 2017-02-20
Supplement: 13073_2017_404_MOESM2_ESM.pdf [file 13073_2017_404_MOESM2_ESM.pdf]

## Additional file 2

| (a)                                      | Oligonucleotides for EMSA probe and competition experiments |                                                |
|------------------------------------------|-------------------------------------------------------------|------------------------------------------------|
| EMSA Probes and competitors              | Sequence 5' to 3' direction                                 | Design of EMSA Probes and competitors based on |
| VSTM1_C Probe                            | Forward – 5'-ACACCGGATTCA <u>C</u> GGGGAAGAAGTT-3'          | C allele of rs612529                           |
|                                          | Reverse – 5'-AACTTCTTCCCC <u>C</u> TGAATCCGGTGT-3'          |                                                |
| VSTM1_T Probe                            | Forward – 5'-ACACCGGATTCA <u>T</u> GGGGAAGAAGTT-3'          | T allele of rs612529                           |
|                                          | Reverse – 5'-AACTTCTTCCCC <u>A</u> TGAATCCGGTGT-3'          |                                                |
| YY1_Consensus                            | Forward – 5'-CGCTCCCCG <u>GCC</u> ATCTTGGCGGCTGGT-3'        | Santa Cruz Biotech. (Cat. Nr. - SC-2533)       |
|                                          | Reverse – 5'-ACCAGCCGCCAAGAT <u>GCC</u> CGGGGAGCG-3'        |                                                |
| YY1_Mutant                               | Forward – 5'-CGCTCCCCGATTATCTTGGCGGCTGGT-3'                 | Santa Cruz Biotech. (Cat. Nr. - SC-2534)       |
|                                          | Reverse – 5'-ACCAGCCGCCAAGATAATCGGGGAGCG-3'                 |                                                |
| MZF1_Consensus 1                         | Forward – 5'-GATCTAAAA <u>GTGGGG</u> AGAAAA-3'              | TRANSFAC prediction                            |
|                                          | Reverse – 5'-TTTTCT <u>CCCCAC</u> TTTTAGATC-3'              |                                                |
| MZF1_Mutant 1                            | Forward – 5'-GATCTAAAA <u>GTTTTT</u> AGAAAA-3'              | TRANSFAC prediction                            |
|                                          | Reverse – 5'-TTTTCT <u>AAAAAC</u> TTTTAGATC-3'              |                                                |
| MZF1_Consensus 2                         | Forward – 5'-GATCCGGCTGGTGAG <u>GGGGG</u> AATCG-3'          | TRANSFAC prediction                            |
|                                          | Reverse – 5'-CGATT <u>CCCCC</u> TCACCAGCCGGATC-3'           |                                                |
| MZF1_Mutant 2                            | Forward – 5'-GATCCGGCTGGTGAG <u>TTTTT</u> AATCG-3'          | TRANSFAC prediction                            |
|                                          | Reverse – 5'-CGATT <u>AAAAA</u> TCACCAGCCGGATC-3'           |                                                |
| PU.1 consensus<br>(Ets family_Consensus) | Forward – 5'-GGGCTGCTTGAG <u>GAA</u> GTATAAGAAT             | Santa Cruz Biotech. (Cat. Nr. - SC-2549)       |
|                                          | Reverse – 5'-ATTCTTATAC <u>TTC</u> CTCAAGCAGCCC             |                                                |
| PU.1 consensus<br>(Ets family_Mutant)    | Forward – 5'-GGGCTGCTTGAG <u>AGA</u> GAGTATAAGAAT           | Santa Cruz Biotech. (Cat. Nr. -SC-2550)        |
|                                          | Reverse – 5'-ATTCTTATAC <u>TCT</u> CTCAAGCAGCCC             |                                                |
| PBX1_Consensus                           | Forward – 5'-CTCCAATTAGTGCATCAA <u>TC</u> AATTTCG           | Santa Cruz Biotech. (Cat. Nr. - SC-2581)       |
|                                          | Reverse – 5'-CGAATT <u>GA</u> TTGATGCACTAATTGGAG            |                                                |
| PBX1_Mutant                              | Forward – 5'-CTCCAATTAGTGCATCAA <u>GG</u> AATTTCG           | Santa Cruz Biotech. (Cat. Nr. - SC-2582)       |
|                                          | Reverse – 5'-CGAATT <u>CC</u> TTGATGCACTAATTGGAG            |                                                |
