# Supplementary material for: A functional SNP associated with atopic dermatitis controls cell type-specific methylation of the VSTM1 gene locus
Source: PubMed Central journal article supplement (PMC5319034; doi:10.1186/s13073-017-0404-6), 2017-02-20

## Additional file 3

### VSTM1 Promoter sequence with primers and CpG information

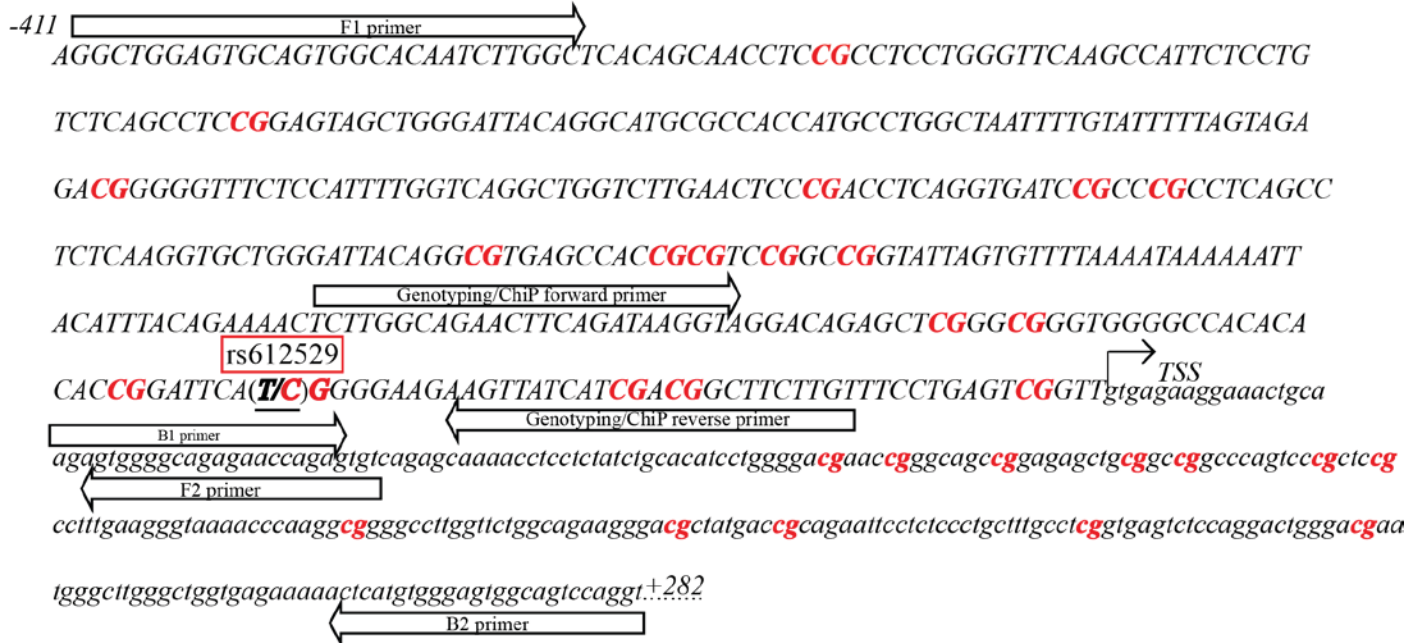

Supplement: 13073_2017_404_MOESM3_ESM.pdf [file 13073_2017_404_MOESM3_ESM.pdf]
