# Supplementary material for: A functional SNP associated with atopic dermatitis controls cell type-specific methylation of the VSTM1 gene locus
Source: PubMed Central journal article supplement (PMC5319034; doi:10.1186/s13073-017-0404-6), 2017-02-20
Supplement: 13073_2017_404_MOESM6_ESM.pdf [file 13073_2017_404_MOESM6_ESM.pdf]

## Additional file 6

### a) JASPAR

(score > 5.0)

| predicted TF | probe | site             | score | probe | site          | score |
|--------------|-------|------------------|-------|-------|---------------|-------|
| SOX10        | T     | CGGTGT           | 5.2   | C     | CGGTGT        | 5.2   |
| SPIB         | T     | ACCGGAT          | 5.2   | C     | ACCGGAT       | 5.2   |
| Hoxc9        | T     | CCCCA TGAATCCG   | 7.7   | C     | -             | -     |
| Hoxa9        | T     | CCC A TGAATCC    | 10.3  | C     | CCC G TGAATCC | 6.4   |
| JUN::FOS     | T     | TGAATCC          | 5.5   | C     | TGAATCC       | 5.5   |
| Pax2         | T     | ATTCA T GG       | 5.7   | C     | ATTCA C GG    | 6.3   |
| Arnt         | T     | -                | -     | C     | CCC G TG      | 6.1   |
| Spi1 (PU.1)  | T     | TTCA T GGGGAAGAA | 5.3   | C     | -             | -     |
| MZF1 (5-13)  | T     | TCA T GGGGA      | 7.3   | C     | -             | -     |
| Mycn         | T     | -                | -     | C     | TCCCC G TG    | 5     |
| MZF1 (1-4)   | T     | T GGGGA          | 9     | C     | C GGGGA       | 8.5   |
| SPIB         | T     | T GGGGA          | 8.1   | C     | C GGGGA       | 4.6   |
| ELF5         | T     | TTCTCCCC         | 5.5   | C     | TTCTCCCC      | 5.5   |
| NFATC2       | T     | TCTTCCC          | 6.4   | C     | TCTTCCC       | 6.4   |
| EHF          | T     | ACTTCTTC         | 6.5   | C     | ACTTCTTC      | 6.5   |

### b) TRANSFAC

(score > 0.9)

| predicted TF   | probe | site                | score | probe | site               | score  |
|----------------|-------|---------------------|-------|-------|--------------------|--------|
| V\$CETS1P54_02 | T     | acacCGGATtcat       | 0.951 | C     | acacCGGATtcac      | 0.95   |
| V\$CETS1_01    | T     | aCCGGAttca          | 0.922 | C     | aCCGGAttca         | 0.92   |
| V\$CETS1P54_01 | T     | aCCGGAttca          | 0.917 | C     | aCCGGAttca         | 0.92   |
| V\$CETS2_01    | T     | acCGGATtca          | 0.908 | C     | acCGGATtca         | 0.91   |
| V\$CMAF_02     | T     | ATTCA               | 0.957 | C     | ATTCA              | 0.96   |
| V\$CEBP_Q3     | T     | ttca t gGGGAag      | 0.955 | C     | ttca c gGGGAag     | 0.93   |
| V\$YY1_Q6_03   | T     | ttca T GG           | 0.946 | C     | -                  | -      |
| V\$SPI1_01     | T     | ttca t ggGGAAGaagtt | 0.93  | C     | ttc acggGGAAGaagtt | 0.92   |
| V\$MZF1_01     | T     | ca t GGGGA          | 0.983 | C     | ca c GGGGA         | 0.98   |
| V\$IK2_01      | T     | ca t GGGGAagaa      | 0.948 | C     | ca c GGGGAagaa     | 0.94   |
| V\$CETS1P54_02 | T     | ca t gGGGAagaag     | 0.936 | C     | ca c gGGGAagaag    | 0.9310 |
| V\$IK1_01      | T     | ca t gGGGAagaag     | 0.905 | C     | ca c gGGGAagaag    | 0.90   |
| V\$MZF1_Q5     | T     | t GGGGAa            | 0.993 | C     | -                  | -      |
| V\$SPI1_03     | T     | t ggGGAAGaa         | 0.959 | C     | c ggGGAAGaa        | 0.96   |
| V\$PU1_Q6      | T     | t ggGGAAG           | 0.952 | C     | c ggGGAAGaa        | 0.94   |
| V\$SPI1_02     | T     | t ggGGAAGaa         | 0.941 | C     | c ggGGAAG          | 0.93   |
| V\$ETS2_Q6     | T     | ggGGAAG             | 0.948 | C     | ggGGAAG            | 0.95   |
| V\$ETS_Q6      | T     | ggGGAAGa            | 0.938 | C     | ggGGAAGa           | 0.94   |
| V\$CETS1_Q6    | T     | gGGAAGa             | 0.932 | C     | gGGAAGa            | 0.93   |
| V\$SPI1_Q5     | T     | GGGAAG              | 0.922 | C     | GGGAAG             | 0.92   |
| V\$HMGY_Q4     | T     | gAAGAA              | 0.998 | C     | gAAGAA             | 1.00   |
